# Supplementary material
Source: publisher figshare collection journal article supplement (https://tandf.figshare.com/ndownloader/files/13050158)
Supplement: Supplementary file 1 [file 13050158]

## Sheet: P. acanthocera
PACHYRHAMMA ACANTHOCERA
Filiform sensilla
Sensilla	Sex		Socket width	Length	Basal width	Tip width	Insertion angle	Club width	All dimensions are arithmetic mean in microns, plus or minus standard error. N is the total number of sensilla able to be measured across all antennal segments for specimens of that sex and species. Angles are in degrees
Bohm's sensilla	Female	Mean	7.77285	31.6108	3.32235	0.638458	89.4714	-
		SE	0.331981	2.58512	0.178767	0.0638594	0.523459	-
		N	20	20	20	24	39	-
	Male	Mean	12.502	35.8142	4.20542	1.33794	87.7446	-
		SE	0.53305	1.22633	0.137111	0.0754393	0.741526	-
		N	42	50	47	48	60	-
S.ba.I	Female	Mean	4.26258	8.136	1.76533	0.733105	89.8541	-
		SE	0.133783	0.326697	0.0564807	0.0410297	0.967106	-
		N	38	28	39	38	23	-
	Male	Mean	5.10137	9.31137	1.98362	0.97725	90.0539	-
		SE	0.611079	1.80931	0.284451	0.210334	1.45273	-
		N	8	8	8	8	6	-
s.ba.II	Female	Mean	8.41985	36.66	3.84408	0.577937	86.7499	-
		SE	0.30977	1.59	0.141482	0.0334347	1.87044	-
		N	46	47	47	47	24	-
	Male	Mean	11.5534	42.77	5.66397	1.27526	67.4758	-
		SE	0.304131	1.79	0.127415	0.0639921	3.26633	-
		N	58	60	60	57	27	-
s.ba.III	Female	Mean	11.2441	49.5255	6.91343	0.317351	86.1379	-
		SE	0.284765	1.86919	0.192505	0.0148992	4.00818	-
		N	47	45	49	37	32	-
	Male	Mean	9.86806	59.3841	5.70014	0.265189	88.2534	-
		SE	0.388185	2.42915	0.129592	0.0221273	2.80233	-
		N	47	44	57	37	24	-
s.ch.Ia	Female	Mean	8.70292	137.405	5.72739	0.905657	65.5217	-
		SE	0.231821	5.39933	0.147711	0.056123	2.22926	-
		N	26	36	36	35	26	-
	Male	Mean	9.13456	133.475	5.57199	1.11816	71.8052	-
		SE	0.391079	4.36213	0.172007	0.0963094	1.9718	-
		N	19	36	36	36	21	-
s.ch.Ib	Female	Mean	11.5113	107.975	4.50687	0.997355	60.6415	-
		SE	0.481355	5.06558	0.211192	0.0435002	3.24241	-
		N	30	33	31	31	33	-
	Male	Mean	10.8073	108.073	5.9373	1.08583	59.0251	-
		SE	0.358479	3.27951	0.15724	0.0355603	2.54112	-
		N	33	36	32	52	41	-
s.ch.II	Female	Mean	11.8792	169.254	7.46431	0.349856	39.1682	-
		SE	0.389237	3.85098	0.200474	0.0127236	1.15138	-
		N	59	60	60	59	59	-
	Male	Mean	11.0815	148.253	6.97125	0.361345	52.8545	-
		SE	0.360888	2.45202	0.189325	0.0191033	2.07045	-
		N	60	60	60	60	60	-
s.ch.III	Female	Mean	9.36749	66.1657	4.86037	0.8708	71.0237	-
		SE	0.32461	2.05209	0.0920373	0.02492	2.29298	-
		N	37	44	43	45	14	-
	Male	Mean	11.134	42.6868	6.09127	1.43467	70.8199	-
		SE	0.240906	1.29501	0.146068	0.0445237	1.27857	-
		N	58	58	58	59	58	-
s.ch.IV	Female	Mean	9.02311	66.9453	4.93427	0.7184	40.8019	-
		SE	0.689533	3.17325	0.171492	0.0472491	5.60767	-
		N	9	15	15	15	9	-
	Male	Mean	-	-	-	-	-	-
		SE	-	Not observed			-	-
		N	-	-	-	-	-	-
s.ch.V	Female	Mean	10.0974	76.3193	4.99395	1.04811	72.301	2.26623
		SE	0.31933	6.10599	0.188765	0.0813673	2.64865	0.119407
		N	19	27	20	27	20	25
	Male	Mean	10.5853	85.359	5.69792	0.9778	80.3135	2.5204
		SE	0.413568	3.96595	0.140217	0.0673368	3.37964	0.0824462
		N	13	14	12	14	11	14
s.ch.VI	Female	Mean	-	-	-	-	-	-
		SE	-	Not observed			-	-
		N	-	-	-	-	-	-
	Male	Mean	16.2143	71.7698	9.76535	0.598367	30.5462	-
		SE	0.255838	1.2142	0.140853	0.0409517	1.90646	-
		N	60	60	60	60	33	-
s.tr.	Female	Mean	10.0259	63.7841	4.52505	0.580629	30.2387	-
		SE	0.268808	2.37665	0.109769	0.0185986	1.77808	-
		N	39	39	42	35	44	-
	Male	Mean	11.8083	56.1769	4.76136	1.74878	37.9532	-
		SE	1.1788	2.16433	0.142517	1.0743	2.90173	-
		N	51	50	50	50	25	-
Non-filiform sensilla
			Length	Width	Pore width
s.ca.	Female	Mean	16.069	12.2407	1.44067
		SE	0.949341	0.550965	0.0622368
		N	3	3	3
	Male	Mean	-	-	-
		SE	-	Not observed	-
		N	-	-	-
			Width	Peg length	Peg width at tip
s.co.	Female	Mean	9.35702	4.0096	0.658444
		SE	0.4251	0.286008	0.0625902
		N	42	10	9
	Male	Mean	9.69542	3.60925	0.705833
		SE	0.299211	0.137756	0.167092
		N	61	4	6

## Sheet: P. waitomoensis
PACHYRHAMMA WAITOMOENSIS
Sensilla	Sex		Socket width	Length	Basal width	Tip width	Insertion angle	All dimensions are arithmetic mean in microns, plus or minus standard error. N is the total number of sensilla able to be measured across all antennal segments for specimen of that sex and species. Angles are in degrees
Bohm's sensilla	Female	Mean	8.03104	27.4913	3.85271	0.678776	90.4662
		SE	0.236945	1.3694	0.131353	0.0227458	0.825113
		N	51	51	49	49	37
	Male	Mean	8.61113	29.528	3.79114	0.678977	88.8883
		SE	0.312697	1.39698	0.133979	0.0318571	0.726868
		N	31	43	36	44	51
S.ba.I	Female	Mean	4.52289	7.60082	1.68575	0.539316	87.3804
		SE	0.310432	0.54676	0.0809809	0.0310839	2.90453
		N	18	22	20	19	10
	Male	Mean	-	-	-	-	-
		SE	-	Not observed			-
		N	-	-	-	-	-
s.ba.II	Female	Mean	6.65406	36.849	3.45882	0.372394	73.7963
		SE	0.20543	1.569	0.115172	0.0190423	2.72563
		N	33	32	33	33	22
	Male	Mean	10.5676	46.3	4.55171	0.939882	69.6524
		SE	0.387504	1.396	0.153366	0.0505057	1.80662
		N	50	48	41	42	27
s.ba.III	Female	Mean	9.29564	45.9029	5.47618	0.226353	77.0874
		SE	0.274271	1.64649	0.128295	0.0180412	3.4397
		N	25	26	28	17	27
	Male	Mean	-	-	-	-	-
		SE	-	Not observed			-
		N	-	-	-	-	-
s.ch.Ia	Female	Mean	8.42508	137.63	5.09165	0.71863	72.8262
		SE	0.32899	4.60627	0.184057	0.0319629	2.59848
		N	13	27	27	27	15
	Male	Mean	-	-	-	-	-
		SE	-	Not observed			-
		N	-	-	-	-	-
s.ch.Ib	Female	Mean	12.9451	115.284	5.86126	1.12067	55.3949
		SE	0.529624	4.41637	0.15989	0.0449682	2.89219
		N	29	32	47	40	42
	Male	Mean	-	-	-	-	-
		SE	-	Not observed			-
		N	-	-	-	-	-
s.ch.II	Female	Mean	7.45032	109.812	5.22452	0.321227	39.4003
		SE	0.192741	2.71224	0.129182	0.013721	2.11181
		N	59	60	60	59	59
	Male	Mean	11.1653	121.258	6.50564	0.401439	36.495
		SE	0.369264	2.54405	0.190504	0.0310851	1.81179
		N	60	60	60	60	60
s.ch.III	Female	Mean	7.514	41.6018	4.31275	0.643	-
		SE	0.483398	1.34739	0.385986	0.0800052	-
		N	4	4	4	4	0
	Male	Mean	10.8915	43.1444	4.804	0.954844	73.0424
		SE	1.02782	1.98008	0.170818	0.051408	2.21838
		N	39	34	34	32	26
s.ch.IV	Female	Mean	8.54853	77.1828	4.87741	0.66892	34.75
		SE	0.460618	4.69192	0.230234	0.0230581	4.84842
		N	15	15	15	15	12
	Male	Mean	6.10367	59.011	3.3255	0.883667	-
		SE	0.578947	2.539	0.0205	0.145685	-
		N	3	2	2	4	0
s.ch.V	Female	Mean	-	-	-	-	-
		SE	-	Not observed			-
		N	-	-	-	-	-
	Male	Mean	-	-	-	-	-
		SE	-	Not observed			-
		N	-	-	-	-	-
s.ch.VI	Female	Mean	9.52065	55.7236	5.3659	0.349861	55.3918
		SE	0.165616	2.24675	0.126107	0.0285461	2.04739
		N	54	52	52	36	25
	Male	Mean	10.6604	61.864	6.47669	0.472846	36.0571
		SE	0.303024	2.01824	0.209935	0.0420851	2.5504
		N	36	31	36	26	27
s.tr.	Female	Mean	8.85202	56.5437	4.09798	0.54756	41.5025
		SE	0.168021	2.23227	0.103331	0.0226892	5.07322
		N	52	53	55	50	27
	Male	Mean	10.9944	52.6384	4.55253	0.643722	50.5742
		SE	0.328088	1.37511	0.136283	0.0346408	5.69567
		N	38	36	36	36	27
Non-filiform sensilla
			Length	Width	Pore width
s.ca.	Female	Mean	10.6934	7.8374	1.05609
		SE	0.635385	0.737742	0.101132
		N	18	15	11
	Male	Mean	-	-	-
		SE	-	Not observed	-
		N	-	-	-
			Width	Peg length	Peg width at tip
s.co.	Female	Mean	8.95422	3.33467	0.525429
		SE	0.393193	0.360019	0.0619239
		N	41	3	7
	Male	Mean	9.53288	4.55044	0.702444
		SE	0.288694	0.194102	0.0752034
		N	48	9	9
